# Supplementary material for: Variation in gene expression patterns in effusions and primary tumors from serous ovarian cancer patients
Source: PubMed Central journal article supplement (PMC1236614; doi:10.1186/1476-4598-4-26), 2005-07-21

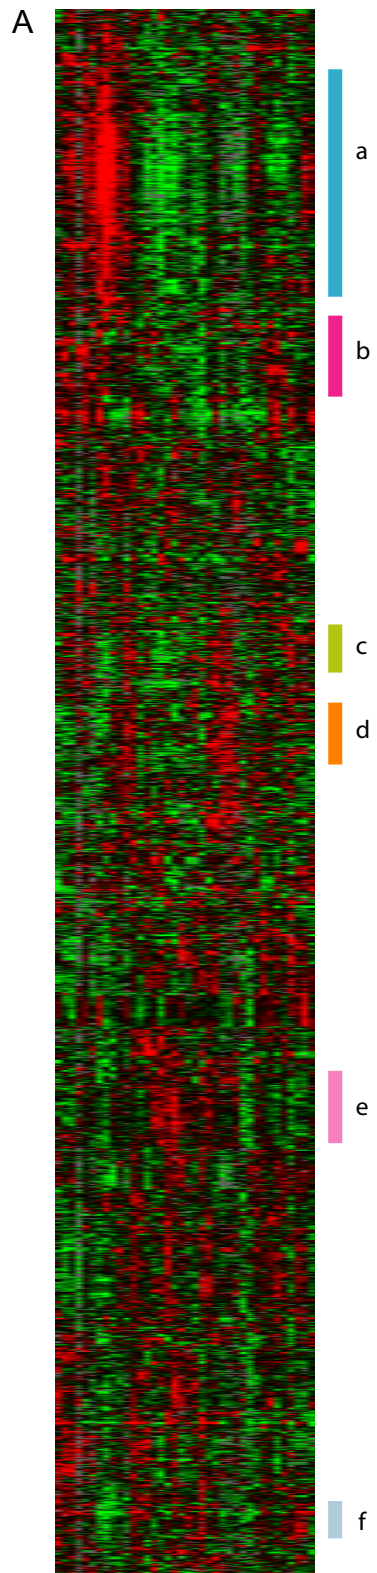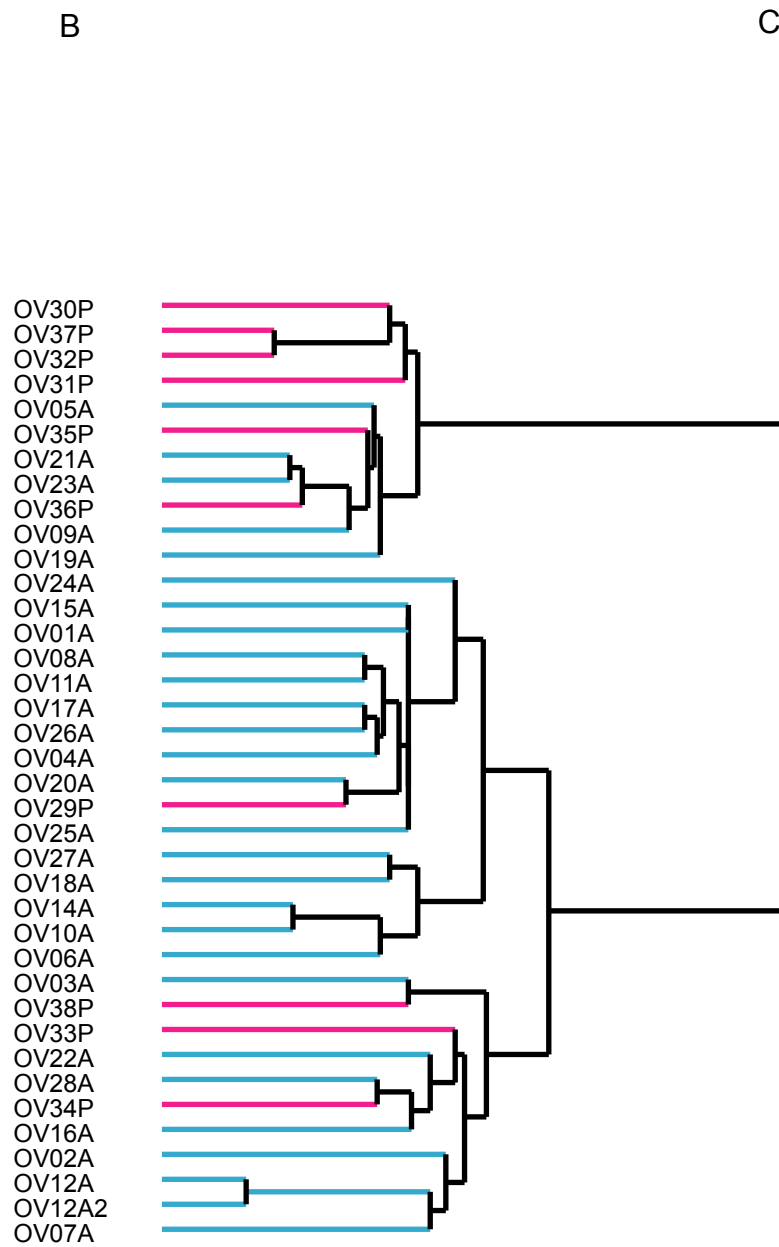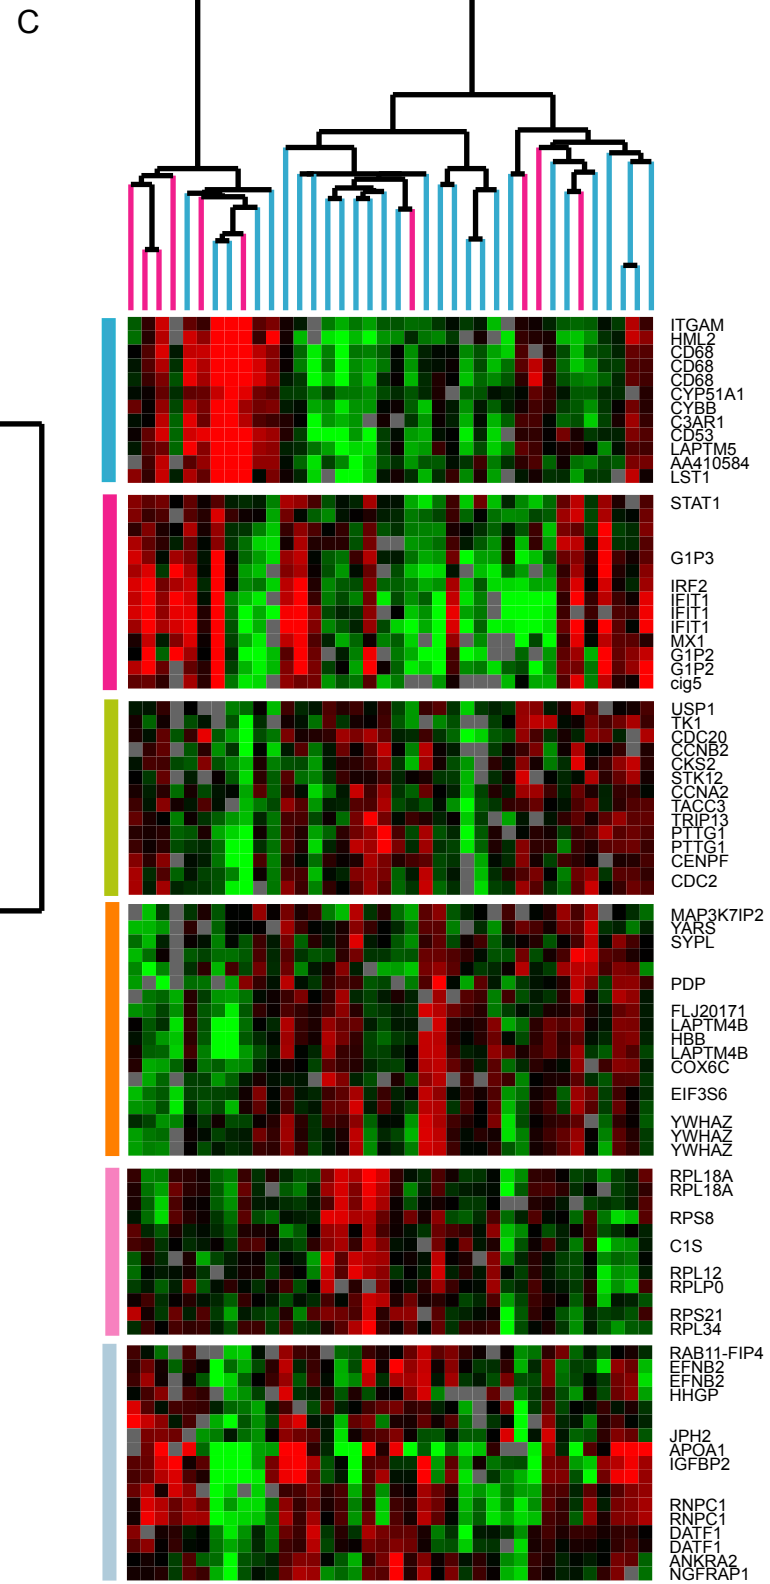

Supplement: 1476-4598-4-26-S4.pdf [file 1476-4598-4-26-S4.pdf]
